# Supplementary material
Source: PubMed Central journal article supplement (PMC3536097)
Supplement: AEM.02467-12_zam999103955so1.pdf [file AEM.02467-12_zam999103955so1.pdf]

**Table S1:** List of variable genes identified in the genomes of *B. adolescentis* strains through CGH experiments

| ORF      | Product                                                                 | 6T | 125B | 145B | 153B | 22L | 369B | 703B |
|----------|-------------------------------------------------------------------------|----|------|------|------|-----|------|------|
| BAD_0003 | recombination protein RecF                                              | +  | -    | +    | +    | +   | -    | +    |
| BAD_0006 | DNA gyrase subunit A                                                    | +  | +    | +    | +    | +   | -    | +    |
| BAD_0012 | carbonic anhydrase                                                      | +  | +    | +    | +    | -   | +    | +    |
| BAD_0014 | PE family protein (fragment)                                            | +  | +    | +    | +    | -   | +    | +    |
| BAD_0015 | SSU ribosomal protein S8P                                               | +  | +    | +    | -    | -   | +    | +    |
| BAD_0017 | phage-associated protein                                                | +  | +    | +    | +    | -   | +    | +    |
| BAD_0019 | hypothetical protein                                                    | +  | +    | +    | -    | +   | +    | +    |
| BAD_0020 | hypothetical protein                                                    | +  | +    | +    | +    | -   | +    | +    |
| BAD_0021 | hypothetical protein                                                    | +  | +    | +    | -    | +   | +    | -    |
| BAD_0027 | tryptophanyl-tRNA synthetase                                            | +  | +    | +    | -    | +   | +    | +    |
| BAD_0028 | hypothetical protein                                                    | +  | +    | +    | -    | +   | +    | +    |
| BAD_0038 | serine-threonine protein kinase                                         | +  | +    | +    | +    | -   | +    | -    |
| BAD_0043 | hypothetical protein                                                    | +  | -    | -    | +    | +   | -    | +    |
| BAD_0048 | hypothetical protein                                                    | +  | +    | -    | +    | +   | -    | +    |
| BAD_0052 | hypothetical protein                                                    | +  | -    | -    | -    | -   | -    | -    |
| BAD_0053 | hypothetical protein                                                    | +  | +    | -    | -    | -   | -    | -    |
| BAD_0054 | putative exodeoxyribonuclease V                                         | +  | +    | +    | -    | -   | +    | -    |
| BAD_0055 | response regulator of two-component system                              | +  | +    | +    | -    | +   | +    | -    |
| BAD_0056 | queuine tRNA-ribosyltransferase                                         | +  | -    | -    | +    | +   | +    | +    |
| BAD_0060 | hypothetical protein                                                    | +  | +    | -    | -    | -   | +    | +    |
| BAD_0066 | fructose-bisphosphate aldolase                                          | +  | +    | +    | +    | +   | -    | +    |
| BAD_0068 | voltage gated channel protein                                           | +  | +    | +    | +    | +   | +    | -    |
| BAD_0070 | branched-chain amino acid ABC-type transport system permease components | +  | +    | +    | +    | +   | +    | -    |
| BAD_0071 | branched-chain amino acid transport system permease protein             | +  | +    | +    | +    | +   | +    | -    |
| BAD_0072 | branched-chain amino acid transport system ATP-binding protein          | +  | +    | +    | +    | +   | +    | -    |
| BAD_0073 | ABC-type branched-chain amino acid transport systems ATPase component   | +  | +    | +    | +    | +   | +    | -    |
| BAD_0074 | branched-chain amino acid transport system substrate-binding protein    | +  | +    | +    | +    | +   | +    | -    |
| BAD_0075 | LacI-type transcriptional regulator                                     | +  | +    | +    | +    | +   | +    | -    |
| BAD_0076 | 4-amino-4-deoxychorismate lyase                                         | +  | +    | +    | +    | +   | +    | -    |
| BAD_0083 | sialic acid-specific 9-O-acetyltransferase                              | +  | +    | +    | +    | -   | +    | +    |
| BAD_0084 | aromatic amino acid transport protein AroP                              | +  | +    | +    | +    | -   | +    | +    |
| BAD_0088 | amino acid permease                                                     | +  | +    | +    | -    | -   | +    | -    |
| BAD_0090 | thiamine biosynthesis protein ThiF                                      | +  | +    | +    | +    | +   | -    | +    |
| BAD_0093 | ABC transporter permease                                                | +  | +    | +    | +    | +   | -    | +    |
| BAD_0096 | hypothetical protein                                                    | +  | +    | -    | -    | +   | +    | +    |
| BAD_0102 | ATP binding protein of ABC transporter                                  | +  | +    | +    | -    | +   | +    | -    |

|          |                                                  |   |   |   |   |   |   |   |
|----------|--------------------------------------------------|---|---|---|---|---|---|---|
| BAD_0103 | hypothetical protein                             | + | + | + | + | + | - | + |
| BAD_0108 | dipeptidase                                      | + | + | + | + | + | + | - |
| BAD_0110 | TetR-type transcriptional regulator              | + | + | + | + | + | - | + |
| BAD_0121 | putative peptidoglycan bound protein             | + | - | - | + | + | - | + |
| BAD_0122 | sortase                                          | + | - | + | + | + | + | + |
| BAD_0131 | hypothetical protein                             | + | - | + | + | + | - | + |
| BAD_0134 | hypothetical protein                             | + | + | + | + | + | - | + |
| BAD_0139 | aspartokinase                                    | + | + | + | + | + | + | - |
| BAD_0147 | hypothetical protein                             | + | + | + | + | - | + | - |
| BAD_0152 | exo-alpha-L-arabinofuranosidase II               | + | + | + | + | - | + | - |
| BAD_0153 | solute binding protein of ABC transporter system | + | + | + | - | + | + | - |
| BAD_0154 | sugar permease of ABC transporter system         | + | + | + | - | + | + | - |
| BAD_0155 | sugar permease of ABC transporter system         | + | + | + | - | - | + | - |
| BAD_0162 | thymidylate kinase                               | + | - | - | + | + | - | + |
| BAD_0163 | DNA polymerase III subunit delta'                | + | - | - | + | + | + | + |
| BAD_0165 | hypothetical protein                             | + | - | - | + | + | - | + |
| BAD_0172 | hypothetical protein                             | + | + | + | + | + | + | - |
| BAD_0187 | ABC transporter solute-binding protein           | + | + | + | - | + | + | + |
| BAD_0188 | ABC transporter permease                         | + | + | + | - | + | + | + |
| BAD_0189 | ABC transporter permease                         | + | + | + | - | + | + | + |
| BAD_0190 | ABC transporter ATP-binding protein              | + | + | + | - | + | + | + |
| BAD_0191 | hypothetical protein                             | + | + | + | - | + | + | + |
| BAD_0193 | hypothetical protein                             | + | + | + | + | + | - | + |
| BAD_0194 | hypothetical protein                             | + | + | + | - | + | + | + |
| BAD_0210 | hypothetical protein                             | + | - | - | + | + | - | + |
| BAD_0213 | amidotransferase                                 | + | - | + | + | + | + | + |
| BAD_0218 | transcription regulator ArsR                     | + | - | + | - | - | - | + |
| BAD_0226 | hypothetical protein                             | + | + | - | + | + | - | + |
| BAD_0233 | hypothetical protein                             | + | + | - | + | + | + | + |
| BAD_0236 | hypothetical protein                             | + | + | + | + | + | - | + |
| BAD_0240 | 50S ribosomal protein L21                        | + | + | + | - | + | + | + |
| BAD_0250 | hypothetical protein                             | + | - | + | + | + | + | + |
| BAD_0254 | JadJ                                             | + | - | - | + | + | + | + |
| BAD_0255 | propionyl-CoA carboxylase beta chain             | + | - | + | + | + | - | + |
| BAD_0257 | putative holo-[acyl-carrier protein] synthase    | + | + | - | + | + | - | + |
| BAD_0263 | hypothetical protein                             | + | + | + | - | + | + | + |
| BAD_0272 | aminopeptidase C                                 | + | - | - | + | + | - | + |
| BAD_0275 | 5'-methylthioadenosine nucleosidase              | + | - | + | + | + | + | + |
| BAD_0298 | hypothetical protein                             | + | + | + | + | - | + | + |
| BAD_0301 | pyridine nucleotide-disulphide oxidoreductase    | + | - | + | + | + | - | + |
| BAD_0309 | 50S ribosomal protein L13                        | + | + | - | + | + | - | + |

|          |                                                                |   |   |   |   |   |   |   |
|----------|----------------------------------------------------------------|---|---|---|---|---|---|---|
| BAD_0311 | glycogen operon protein GlgX                                   | + | + | + | - | - | + | - |
| BAD_0312 | hypothetical protein                                           | + | - | + | + | + | + | + |
| BAD_0313 | zinc-binding dehydrogenase                                     | + | + | + | - | - | + | - |
| BAD_0334 | 30S ribosomal protein S14                                      | + | + | + | + | + | - | + |
| BAD_0348 | 50S ribosomal protein L17                                      | + | - | + | + | + | + | + |
| BAD_0355 | ribosome-binding factor A                                      | + | - | + | + | + | - | + |
| BAD_0382 | hypothetical protein                                           | + | - | - | + | + | - | + |
| BAD_0384 | hypothetical protein                                           | + | + | + | - | + | + | - |
| BAD_0393 | nucleoside-diphosphate-sugar epimerase                         | + | + | + | + | + | + | - |
| BAD_0394 | hypothetical protein                                           | + | + | + | + | + | + | - |
| BAD_0395 | hypothetical protein                                           | + | + | + | + | + | + | - |
| BAD_0396 | glycosyltransferase I                                          | + | + | + | + | + | + | - |
| BAD_0397 | hypothetical protein                                           | + | + | + | + | + | + | - |
| BAD_0398 | spore coat protein H                                           | + | + | + | - | + | + | - |
| BAD_0400 | hypothetical protein                                           | + | + | - | + | + | + | - |
| BAD_0401 | hypothetical protein                                           | + | + | + | + | + | + | - |
| BAD_0402 | putative 200 kDa antigen p200                                  | + | + | + | + | + | + | - |
| BAD_0411 | dihydropteroate synthase 1                                     | + | + | + | + | + | - | + |
| BAD_0414 | Acyl-CoA thioesterase II                                       | + | - | - | + | + | + | + |
| BAD_0416 | hypothetical protein                                           | + | + | - | - | + | + | + |
| BAD_0423 | alpha-L-arabinofuranosidase                                    | + | + | - | + | + | + | + |
| BAD_0425 | putative sugar transporter solute-binding protein              | + | - | + | + | + | - | + |
| BAD_0430 | putative esterase                                              | + | + | + | + | + | - | + |
| BAD_0433 | XylR-type repressor                                            | + | + | + | + | - | + | + |
| BAD_0434 | gamma-glutamyltranspeptidase                                   | + | + | + | - | + | + | + |
| BAD_0435 | beta-galactosidase                                             | + | + | + | - | - | - | + |
| BAD_0436 | transcriptional regulator                                      | + | + | + | - | + | + | + |
| BAD_0437 | TetR-type transcriptional regulator                            | + | + | + | - | - | + | + |
| BAD_0438 | xylan esterase                                                 | + | + | + | - | + | + | - |
| BAD_0460 | citrate synthase 1                                             | + | - | - | + | + | - | + |
| BAD_0470 | ABC transporter solute-binding protein                         | + | + | - | + | + | - | + |
| BAD_0478 | phosphopantothencysteine decarboxylase                         | + | - | - | + | + | - | + |
| BAD_0479 | solute binding protein of ABC transporter systemy for peptides | + | + | - | + | + | + | + |
| BAD_0480 | peptide ABC transporter permease                               | + | + | + | - | + | + | - |
| BAD_0481 | peptide ABC transporter permease                               | + | + | + | - | + | + | - |
| BAD_0482 | peptide ABC transporter ATP-binding protein                    | + | + | + | - | + | + | - |
| BAD_0484 | hypothetical protein                                           | + | + | + | - | + | + | - |
| BAD_0485 | hypothetical protein                                           | + | + | + | + | + | + | - |
| BAD_0487 | hypothetical protein                                           | + | + | + | - | - | + | - |
| BAD_0488 | ABC transporter                                                | + | - | + | - | - | + | - |
| BAD_0489 | hypothetical protein                                           | + | + | + | - | + | + | - |

|          |                                                        |   |   |   |   |   |   |   |
|----------|--------------------------------------------------------|---|---|---|---|---|---|---|
| BAD_0493 | S-ribosylhomocysteinase                                | + | + | + | + | + | - | + |
| BAD_0508 | hypothetical protein                                   | + | + | + | - | - | + | + |
| BAD_0517 | metal uptake regulator ferric uptake regulator protein | + | - | - | + | + | + | + |
| BAD_0521 | amidophosphoribosyltransferase                         | + | + | + | + | + | + | - |
| BAD_0522 | hypothetical protein                                   | + | + | + | - | + | + | + |
| BAD_0528 | Na <sup>+</sup> dependent nucleoside transporter       | + | + | + | - | + | + | + |
| BAD_0552 | DNA-binding protein HB1                                | + | - | - | + | + | - | + |
| BAD_0558 | hypothetical protein                                   | + | - | + | + | + | + | + |
| BAD_0562 | magnesium chelatase family protein                     | + | - | + | + | + | + | + |
| BAD_0585 | recombination factor protein RarA                      | + | + | + | - | + | + | + |
| BAD_0586 | efflux-type transporter                                | + | + | + | - | + | + | + |
| BAD_0604 | transport protein                                      | + | + | + | - | + | + | + |
| BAD_0610 | hypothetical protein                                   | + | + | + | - | - | + | + |
| BAD_0635 | two-component system sensor histidine kinase           | + | - | - | + | + | - | + |
| BAD_0641 | hypothetical protein                                   | + | - | + | + | + | + | + |
| BAD_0659 | WhiB-type transcription regulator                      | + | - | + | + | + | + | + |
| BAD_0677 | hypothetical protein                                   | + | + | + | + | + | + | - |
| BAD_0685 | 3-phosphoshikimate 1-carboxyvinyltransferase           | + | + | + | - | + | + | - |
| BAD_0699 | secreted protein                                       | + | + | - | + | + | + | + |
| BAD_0702 | hypothetical protein                                   | + | + | - | + | + | + | + |
| BAD_0706 | 3-dehydroquinate dehydratase                           | + | + | - | - | + | + | + |
| BAD_0708 | pullulanase                                            | + | + | + | - | - | + | - |
| BAD_0714 | hypothetical protein                                   | + | - | + | + | + | + | + |
| BAD_0729 | hypothetical protein                                   | + | + | + | + | + | + | - |
| BAD_0730 | hypothetical protein                                   | + | + | + | + | + | + | - |
| BAD_0732 | MarR family regulatory protein                         | + | + | + | + | + | + | - |
| BAD_0733 | putative drug resistance transporter                   | + | + | + | + | + | + | - |
| BAD_0735 | protein crcB homolog 3                                 | + | - | - | + | + | - | - |
| BAD_0736 | hypothetical protein                                   | + | + | + | + | + | + | - |
| BAD_0737 | cobalt ABC transporter permease                        | + | + | + | + | + | + | - |
| BAD_0738 | ATP binding protein of ABC transporter                 | + | + | + | + | + | + | - |
| BAD_0739 | hypothetical protein                                   | + | + | + | + | + | + | - |
| BAD_0741 | hypothetical protein                                   | + | + | + | + | + | + | - |
| BAD_0753 | hypothetical protein                                   | + | - | + | + | + | - | + |
| BAD_0777 | inosine 5-monophosphate dehydrogenase                  | + | + | + | - | + | + | + |
| BAD_0799 | hypothetical protein                                   | + | + | - | + | + | + | + |
| BAD_0807 | adenine phosphoribosyltransferase                      | + | - | - | + | + | + | + |
| BAD_0821 | anaerobic C4-dicarboxylate transport protein           | + | + | + | + | + | - | + |
| BAD_0824 | hypothetical protein                                   | + | - | + | + | + | + | + |
| BAD_0826 | hypothetical protein                                   | + | - | + | + | + | + | + |
| BAD_0843 | hypothetical protein                                   | + | - | - | + | + | - | + |

|          |                                                              |   |   |   |   |   |   |   |
|----------|--------------------------------------------------------------|---|---|---|---|---|---|---|
| BAD_0850 | putative ABC transporter                                     | + | + | + | - | + | + | + |
| BAD_0855 | regulatory protein                                           | + | - | + | + | + | - | + |
| BAD_0860 | hypothetical protein                                         | + | + | - | + | + | + | + |
| BAD_0870 | hypothetical protein                                         | + | - | - | + | + | + | + |
| BAD_0875 | CBS domain-containing protein                                | + | + | + | - | + | + | - |
| BAD_0877 | hypothetical protein                                         | + | + | + | - | + | + | - |
| BAD_0880 | hypothetical protein                                         | + | + | + | - | - | + | - |
| BAD_0881 | type III restriction enzyme                                  | + | + | + | - | - | + | - |
| BAD_0882 | hypothetical protein                                         | + | + | + | + | - | + | - |
| BAD_0883 | hypothetical protein                                         | + | + | + | - | - | + | - |
| BAD_0891 | ABC transporter ATP-binding protein                          | + | + | + | + | + | - | + |
| BAD_0902 | serine hydroxymethyltransferase                              | + | + | + | + | - | + | + |
| BAD_0905 | GntR family transcriptional regulator                        | + | - | - | - | - | + | + |
| BAD_0906 | hydrolyase                                                   | + | + | + | - | - | + | + |
| BAD_0907 | DNA repair protein RecN                                      | + | + | + | - | + | + | + |
| BAD_0908 | inorganic polyphosphate/ATP-NAD kinase                       | + | + | + | + | + | + | - |
| BAD_0913 | hypothetical protein                                         | + | + | + | - | + | + | + |
| BAD_0917 | hypothetical protein                                         | + | - | + | + | + | + | + |
| BAD_0932 | hypothetical protein                                         | + | + | + | - | - | + | - |
| BAD_0933 | acyl protein synthase                                        | + | + | + | - | - | + | - |
| BAD_0935 | 3-oxoacyl-[acyl-carrier protein] reductase                   | + | + | + | + | - | + | + |
| BAD_0936 | hypothetical protein                                         | + | - | + | - | - | + | - |
| BAD_0937 | hypothetical protein                                         | + | + | + | + | + | + | - |
| BAD_0938 | integral membrane protein                                    | + | + | + | - | - | + | - |
| BAD_0939 | phage integrase                                              | + | + | + | - | + | + | - |
| BAD_0940 | hypothetical protein                                         | + | + | + | - | + | + | - |
| BAD_0941 | putative endonuclease/exonuclease/phosphatase family protein | + | + | + | + | + | + | - |
| BAD_0942 | putative ATP/GTP-binding protein                             | + | + | + | - | - | + | - |
| BAD_0972 | ABC transporter solute-binding protein                       | + | + | + | - | - | + | - |
| BAD_0973 | D-tyrosyl-tRNA(Tyr) deacylase                                | + | + | + | - | + | + | + |
| BAD_0974 | hypothetical protein                                         | + | + | + | - | + | + | - |
| BAD_0975 | glycosyl transferase                                         | + | - | - | - | - | - | - |
| BAD_0977 | nucleotidyltransferase family protein                        | + | + | + | - | - | + | + |
| BAD_0978 | hypothetical protein                                         | + | + | + | - | - | + | + |
| BAD_0979 | hypothetical protein                                         | + | - | + | - | - | - | + |
| BAD_0984 | hypothetical protein                                         | + | + | + | - | + | + | + |
| BAD_0985 | putative DNA polymerase III epsilon subunit                  | + | + | - | + | + | + | + |
| BAD_0986 | homocysteine methyltransferase                               | + | + | + | - | + | + | + |
| BAD_0987 | histidine permease                                           | + | + | + | - | + | + | + |
| BAD_0994 | glutamine-dependent NAD(+) synthetase                        | + | - | - | + | + | + | + |
| BAD_1001 | peptidyl-prolyl cis-trans isomerase                          | + | - | - | - | + | - | + |

|          |                                                 |   |   |   |   |   |   |   |
|----------|-------------------------------------------------|---|---|---|---|---|---|---|
| BAD_1016 | hypothetical protein                            | + | + | - | + | + | + | - |
| BAD_1019 | anthranilate phosphoribosyltransferase          | + | + | + | + | + | + | - |
| BAD_1030 | mannan endo-1,4-beta-mannosidase precursor      | + | + | + | - | - | + | + |
| BAD_1050 | hypothetical protein                            | + | + | + | - | + | + | - |
| BAD_1056 | hypothetical protein                            | + | + | + | + | + | - | + |
| BAD_1067 | chorismate mutase                               | + | + | + | + | + | - | + |
| BAD_1093 | peptide ABC transporter permease                | + | - | + | + | + | + | + |
| BAD_1113 | transcriptional regulator NrdR                  | + | + | + | + | + | - | + |
| BAD_1114 | hypothetical protein                            | + | + | + | - | + | + | + |
| BAD_1122 | hypothetical protein                            | + | + | + | - | - | + | + |
| BAD_1141 | phosphate ABC transporter                       | + | + | + | - | - | + | + |
| BAD_1144 | hydroxyethylthiazole kinase                     | + | + | - | + | - | + | + |
| BAD_1152 | ABC transporter solute-binding protein          | + | + | + | - | + | + | + |
| BAD_1153 | inosine-uridine preferring nucleoside hydrolase | + | + | + | - | - | + | + |
| BAD_1159 | hypothetical protein                            | + | + | + | + | + | - | + |
| BAD_1160 | hypothetical protein                            | + | - | + | + | + | - | + |
| BAD_1169 | hypothetical protein                            | + | - | - | + | + | + | + |
| BAD_1173 | L-asparagineamidohydrolase                      | + | + | + | + | + | - | + |
| BAD_1176 | hypothetical protein                            | + | + | + | - | + | + | - |
| BAD_1177 | putative transposase                            | + | - | + | - | - | + | - |
| BAD_1179 | CRISPR-associated Cas2 family protein           | + | + | + | - | - | + | - |
| BAD_1180 | CRISPR-associated DNA polymerase                | + | + | + | - | + | + | - |
| BAD_1181 | hypothetical protein                            | + | + | + | - | - | + | - |
| BAD_1183 | CRISPR-associated Csd1 family protein           | + | + | + | - | + | + | - |
| BAD_1184 | CRISPR-associated Csd1 family protein           | + | + | + | - | - | + | - |
| BAD_1185 | CRISPR-associated Cas5d family protein          | + | + | + | + | + | + | - |
| BAD_1186 | putative CRISPR-associated helicase             | + | + | + | - | - | + | - |
| BAD_1187 | isoleucyl-tRNA synthetase                       | + | + | + | + | + | + | - |
| BAD_1195 | TetR-type transcriptional regulator             | + | + | + | - | + | + | + |
| BAD_1203 | xylan beta-1,4-xylosidase                       | + | + | + | - | + | + | + |
| BAD_1205 | alpha-L-arabinosidase                           | + | + | + | - | + | + | + |
| BAD_1207 | TetR-type transcriptional regulator             | + | + | + | - | - | + | + |
| BAD_1209 | membrane protein with transport function        | + | + | + | + | + | + | - |
| BAD_1211 | beta-galactosidase I                            | + | - | + | - | - | + | - |
| BAD_1212 | TetR-type transcriptional regulator             | + | + | - | - | + | + | - |
| BAD_1218 | hypothetical protein                            | + | + | - | - | + | - | + |
| BAD_1219 | hypothetical protein                            | + | + | + | - | + | + | + |
| BAD_1221 | hypothetical protein                            | + | + | + | - | + | + | + |
| BAD_1222 | hypothetical protein                            | + | + | - | + | + | + | + |
| BAD_1223 | hypothetical protein                            | + | + | + | - | + | + | + |
| BAD_1224 | aspartate aminotransferase                      | + | + | + | + | + | - | + |

|          |                                                              |   |   |   |   |   |   |   |
|----------|--------------------------------------------------------------|---|---|---|---|---|---|---|
| BAD_1228 | restriction endonuclease                                     | + | + | + | - | + | + | - |
| BAD_1229 | putative type II restriction enzyme Sau3AI                   | + | + | + | - | - | + | - |
| BAD_1230 | helicase                                                     | + | + | + | - | - | + | - |
| BAD_1231 | hypothetical protein                                         | + | + | + | - | + | + | - |
| BAD_1232 | type II restriction enzyme Sau3AI                            | + | + | + | - | + | + | - |
| BAD_1233 | modification methylase Sau3AI                                | + | + | + | - | - | + | - |
| BAD_1234 | hypothetical protein                                         | + | + | + | - | + | + | + |
| BAD_1235 | transmembrane protein                                        | + | + | + | - | + | + | + |
| BAD_1236 | hypothetical protein                                         | + | - | + | + | + | + | + |
| BAD_1239 | putative transcriptional regulator                           | + | + | + | - | + | + | - |
| BAD_1240 | apolipoprotein N-acyltransferase                             | + | + | + | - | + | + | - |
| BAD_1241 | replicase                                                    | + | + | + | - | + | + | - |
| BAD_1242 | hypothetical protein                                         | + | + | + | - | + | + | - |
| BAD_1243 | hypothetical protein                                         | + | + | + | + | + | + | - |
| BAD_1245 | hypothetical protein                                         | + | + | + | - | - | + | - |
| BAD_1247 | two-component sensor histidine kinase involved in chemotaxis | + | + | + | + | + | + | - |
| BAD_1249 | hypothetical protein                                         | + | + | + | - | - | + | - |
| BAD_1250 | hypothetical protein                                         | + | + | + | - | - | + | - |
| BAD_1251 | hypothetical protein                                         | + | - | + | + | + | + | - |
| BAD_1254 | hypothetical protein                                         | + | - | - | - | - | - | - |
| BAD_1257 | hypothetical protein                                         | + | + | + | - | + | + | - |
| BAD_1258 | hypothetical protein                                         | + | + | + | - | - | + | - |
| BAD_1259 | hypothetical protein                                         | + | + | + | - | + | + | + |
| BAD_1260 | glutamine ABC transporter ATP-binding protein                | + | + | + | - | - | + | - |
| BAD_1262 | hypothetical protein                                         | + | + | + | - | + | + | - |
| BAD_1264 | hypothetical protein                                         | + | + | + | - | - | + | - |
| BAD_1267 | DNA-binding response regulator                               | + | + | + | + | + | + | - |
| BAD_1268 | DNA-binding response regulator                               | + | + | + | - | + | + | - |
| BAD_1269 | hypothetical protein                                         | + | + | + | - | + | + | - |
| BAD_1270 | hypothetical protein                                         | + | + | + | + | + | + | - |
| BAD_1273 | hypothetical protein                                         | + | + | + | - | + | + | - |
| BAD_1275 | hypothetical protein                                         | + | + | + | - | + | + | - |
| BAD_1276 | hypothetical protein                                         | + | + | + | - | - | + | - |
| BAD_1277 | cobalt ABC transporter ATP-binding protein                   | + | + | + | - | + | + | - |
| BAD_1278 | filamentous haemagglutinin                                   | + | + | + | - | - | + | - |
| BAD_1280 | type II restriction-modification systemrestriction subunit   | + | - | - | - | - | - | - |
| BAD_1281 | type II restriction-modification systemrestriction subunit   | + | + | + | - | - | + | - |
| BAD_1282 | restriction endonuclease RKpn2kI                             | + | + | + | - | - | + | - |
| BAD_1284 | DNA invertase-like protein                                   | + | + | + | - | + | + | - |
| BAD_1285 | hypothetical protein                                         | + | + | + | + | + | - | - |
| BAD_1287 | beta-glucosidase                                             | + | + | + | + | + | + | - |

|          |                                                          |   |   |   |   |   |   |   |
|----------|----------------------------------------------------------|---|---|---|---|---|---|---|
| BAD_1289 | ABC transporter sugar permease                           | + | + | + | + | + | + | - |
| BAD_1290 | sugar ABC transporter binding protein                    | + | + | + | + | + | + | - |
| BAD_1291 | ribose operon repressor                                  | + | + | + | + | + | + | - |
| BAD_1292 | DNA polymerase III                                       | + | + | + | + | - | + | + |
| BAD_1308 | putative beta-lactamase (class A) precursor              | + | + | - | - | - | + | + |
| BAD_1309 | hypothetical protein                                     | + | + | + | - | - | + | + |
| BAD_1324 | hypothetical protein                                     | + | + | + | + | - | + | + |
| BAD_1326 | LacI-type transcriptional regulator                      | + | + | + | - | + | + | + |
| BAD_1328 | sugar ABC transporter permease                           | + | + | + | - | + | + | + |
| BAD_1329 | polysaccharide ABC transporter permease                  | + | + | + | - | + | + | + |
| BAD_1330 | ABC transporter                                          | + | + | + | - | + | + | + |
| BAD_1339 | hypothetical protein                                     | + | + | + | + | + | + | - |
| BAD_1340 | 3-isopropylmalate dehydrogenase                          | + | + | + | + | + | + | - |
| BAD_1341 | hypothetical protein                                     | + | + | + | - | - | + | - |
| BAD_1349 | thioredoxin                                              | + | - | + | - | + | + | + |
| BAD_1351 | prolipoprotein                                           | + | - | - | - | - | - | - |
| BAD_1352 | hypothetical protein                                     | + | + | + | - | - | + | - |
| BAD_1354 | hypothetical protein                                     | + | + | + | - | - | + | - |
| BAD_1356 | hypothetical protein                                     | + | - | + | - | - | + | - |
| BAD_1357 | hypothetical protein                                     | + | + | + | - | + | + | - |
| BAD_1358 | Etk-like tyrosine kinase                                 | + | + | + | - | - | + | - |
| BAD_1359 | hypothetical protein                                     | + | + | + | - | - | + | - |
| BAD_1360 | hypothetical protein                                     | + | + | - | - | - | - | - |
| BAD_1361 | ribonuclease                                             | + | + | + | - | - | + | - |
| BAD_1362 | hydroxymethylglutaryl-CoA synthase                       | + | - | + | - | - | + | - |
| BAD_1363 | ABC transporter                                          | + | + | + | - | + | + | - |
| BAD_1364 | putative transcriptional regulator                       | + | + | + | - | + | + | - |
| BAD_1365 | hypothetical protein                                     | + | + | + | - | - | + | - |
| BAD_1366 | hypothetical protein                                     | + | + | - | - | + | + | - |
| BAD_1367 | putative transposase                                     | + | + | + | - | + | + | - |
| BAD_1368 | phage AbiD protein                                       | + | + | + | - | + | + | - |
| BAD_1369 | ISSdy1_ transposase OrfB                                 | + | + | + | + | + | + | - |
| BAD_1370 | ImpB/MucB/SamB family protein                            | + | + | + | - | - | + | - |
| BAD_1371 | Na <sup>+</sup> /H <sup>+</sup> -dicarboxylate symporter | + | + | + | - | + | + | - |
| BAD_1373 | transposase subunit B                                    | + | + | + | - | - | + | + |
| BAD_1374 | IS3 family transposase                                   | + | + | + | - | - | + | - |
| BAD_1375 | putative transposase                                     | + | + | - | - | - | - | - |
| BAD_1376 | insertion element hypothetical protein                   | + | + | + | + | - | + | - |
| BAD_1377 | insertion element IS6110 hypothetical protein            | + | + | + | - | - | - | - |
| BAD_1379 | hypothetical protein                                     | + | + | + | - | - | - | - |
| BAD_1381 | fhiA protein                                             | + | + | + | - | + | + | - |



|          |                                                                       |   |   |   |   |   |   |   |
|----------|-----------------------------------------------------------------------|---|---|---|---|---|---|---|
| BAD_1383 | hypothetical protein                                                  | + | - | - | - | - | - | - |
| BAD_1384 | hypothetical protein                                                  | + | + | + | - | + | + | - |
| BAD_1385 | putative glycosyltransferase                                          | + | + | + | - | + | + | - |
| BAD_1386 | hypothetical protein                                                  | + | - | + | - | - | + | - |
| BAD_1387 | spore coat protein                                                    | + | + | - | - | - | - | - |
| BAD_1388 | capsular polysaccharide biosynthesis proteinCps4H                     | + | + | + | + | - | + | - |
| BAD_1389 | galactosyl transferase CpsD                                           | + | + | + | - | - | + | - |
| BAD_1390 | hypothetical protein                                                  | + | + | + | - | + | + | - |
| BAD_1391 | hypothetical protein                                                  | + | + | + | - | - | + | - |
| BAD_1392 | regulatory protein                                                    | + | + | + | - | - | + | - |
| BAD_1394 | putative 200 kDa antigen p200                                         | + | + | + | + | - | + | - |
| BAD_1395 | H(+)-stimulated manganese uptake system protein                       | + | - | - | + | + | - | + |
| BAD_1397 | hypothetical protein                                                  | + | + | + | + | + | + | - |
| BAD_1398 | hypothetical protein                                                  | + | + | + | + | - | + | + |
| BAD_1402 | beta-galactosidase precursor                                          | + | + | + | + | - | + | + |
| BAD_1404 | ABC-type sugar transport systems, permease components                 | + | + | + | + | - | + | + |
| BAD_1405 | putative periplasmic binding (signal peptide) ABC transporter protein | + | + | + | + | - | + | + |
| BAD_1425 | hypothetical protein                                                  | + | - | - | + | + | - | + |
| BAD_1434 | homoserine O-succinyltransferase                                      | + | + | + | + | + | - | + |
| BAD_1436 | ABC transporter                                                       | + | + | + | + | + | + | - |
| BAD_1438 | cation efflux system protein                                          | + | - | - | + | - | + | - |
| BAD_1439 | hypothetical protein                                                  | + | - | + | + | - | + | - |
| BAD_1440 | hypothetical protein                                                  | + | - | + | + | - | + | - |
| BAD_1442 | two-component response regulator                                      | + | + | + | + | - | + | + |
| BAD_1443 | hypothetical protein                                                  | + | + | + | + | - | + | - |
| BAD_1452 | chorismate mutase                                                     | + | + | + | + | + | - | + |
| BAD_1456 | acetyltransferase                                                     | + | + | - | + | + | + | + |
| BAD_1462 | hypothetical protein                                                  | + | + | + | + | + | - | + |
| BAD_1463 | copper-transporting ATPase                                            | + | + | - | + | + | + | + |
| BAD_1464 | chaperone clpB                                                        | + | - | - | + | + | - | + |
| BAD_1467 | cell surface protein fimafimbrial subunit                             | + | + | + | + | - | + | - |
| BAD_1468 | hypothetical protein                                                  | + | + | + | + | + | + | - |
| BAD_1475 | glycerol uptake facilitator protein                                   | + | + | + | + | + | - | + |
| BAD_1476 | hypothetical protein                                                  | + | - | + | + | + | - | + |
| BAD_1485 | PfkB family sugar kinase                                              | + | - | - | - | - | + | + |
| BAD_1486 | putative nucleoside hydrolase protein                                 | + | + | + | - | - | + | + |
| BAD_1488 | hypothetical protein                                                  | + | - | + | - | - | - | + |
| BAD_1489 | ATPase                                                                | + | + | + | - | - | + | + |
| BAD_1490 | transcription regulator protein                                       | + | + | + | - | + | + | + |
| BAD_1492 | hypothetical protein                                                  | + | - | - | + | + | - | + |
| BAD_1494 | putative acetyl CoA carboxylase beta subunit                          | + | - | - | - | - | + | + |

|          |                                                    |   |   |   |   |   |   |   |
|----------|----------------------------------------------------|---|---|---|---|---|---|---|
| BAD_1495 | rhamnose biosynthesis dTDP-glucose 4,6-dehydratase | + | - | - | - | + | + | - |
| BAD_1496 | hypothetical protein                               | + | - | + | - | + | + | - |
| BAD_1497 | hypothetical protein                               | + | + | + | - | - | + | - |
| BAD_1498 | hypothetical protein                               | + | + | + | + | + | + | - |
| BAD_1499 | glycosyl transferase                               | + | + | + | - | - | + | - |
| BAD_1500 | ATP-driven polysaccharide export protein           | + | + | + | - | + | + | - |
| BAD_1501 | polysaccharide ABC transporter permease            | + | + | - | - | - | + | - |
| BAD_1502 | hypothetical protein                               | + | + | + | - | - | + | - |
| BAD_1503 | hypothetical protein                               | + | + | + | + | + | + | - |
| BAD_1504 | hypothetical protein                               | + | + | + | - | - | + | - |
| BAD_1505 | glycosyltransferase                                | + | + | + | - | + | + | - |
| BAD_1506 | nucleoside-diphosphate-sugar epimerases-like       | + | - | + | - | - | - | - |
| BAD_1507 | rhamnose biosynthesis dTDP-glucose 4,6-dehydratase | + | + | - | - | + | - | - |
| BAD_1508 | fused dTDP-4-keto-L-rhamnose reductase             | + | + | - | - | - | + | - |
| BAD_1509 | hypothetical protein                               | + | + | + | - | - | + | - |
| BAD_1510 | proline symporter                                  | + | + | + | + | + | + | - |
| BAD_1511 | 1,4-beta-N-acetylmuramidase                        | + | - | - | + | + | - | + |
| BAD_1516 | hypothetical protein                               | + | + | + | - | + | + | - |
| BAD_1531 | ABC transporter permease                           | + | + | + | - | + | + | + |
| BAD_1537 | hypothetical protein                               | + | + | - | + | + | - | + |
| BAD_1539 | hypothetical protein                               | + | + | + | + | + | - | + |
| BAD_1548 | alkaline phosphatase                               | + | + | + | - | + | + | + |
| BAD_1549 | hypothetical protein                               | + | + | - | + | + | + | - |
| BAD_1550 | hypothetical protein                               | + | + | - | - | + | + | - |
| BAD_1551 | sortase family protein                             | + | + | + | + | + | + | - |
| BAD_1553 | putative diguanylate cyclase                       | + | + | + | - | + | + | + |
| BAD_1554 | hypothetical protein                               | + | + | + | - | - | + | + |
| BAD_1555 | putative death on curing protein                   | + | + | + | - | - | + | + |
| BAD_1556 | LacI-type transcriptional regulator                | + | + | + | - | + | + | + |
| BAD_1559 | pullulanase precursor                              | + | + | + | - | - | + | - |
| BAD_1562 | hypothetical protein                               | + | + | + | - | - | + | + |
| BAD_1568 | NADPH-flavin oxidoreductase                        | + | + | + | + | + | - | + |
| BAD_1569 | Sir2-type regulatory protein                       | + | + | + | + | - | + | - |
| BAD_1579 | phospholipase/carboxylesterase                     | + | + | + | - | - | + | + |
| BAD_1583 | hypothetical protein                               | + | + | + | + | + | - | + |
| BAD_1585 | putative solute-binding lipoprotein                | + | + | + | - | + | + | - |
| BAD_1586 | ABC transporter membrane component                 | + | + | + | - | + | + | - |
| BAD_1587 | sugar permeases                                    | + | + | + | - | + | + | - |
| BAD_1588 | hypothetical protein                               | + | + | + | + | + | - | + |
| BAD_1591 | tRNA/rRNA methyltransferase protein                | + | - | + | + | - | - | + |
| BAD_1595 | two-component sensor histidine kinase              | + | + | + | + | - | + | + |

|          |                                                              |   |   |   |   |   |   |   |
|----------|--------------------------------------------------------------|---|---|---|---|---|---|---|
| BAD_1600 | transposase                                                  | + | + | - | + | - | - | + |
| BAD_1601 | putative endonuclease/exonuclease/phosphatase family protein | + | + | - | - | + | - | + |
| BAD_1602 | N-acetylglucosamine-6-phosphate deacetylase                  | + | + | + | + | + | + | - |
| BAD_1603 | beta-galactosidase                                           | + | + | + | + | + | + | - |
| BAD_1608 | acetyltransferase                                            | + | - | - | - | + | + | - |
| BAD_1610 | beta-glucosidase                                             | + | + | + | - | - | + | + |
| BAD_1615 | dimethyladenosine transferase                                | + | - | - | + | + | - | + |
| BAD_1617 | hypothetical protein                                         | + | + | - | + | + | + | + |
| BAD_1623 | thioredoxin reductase                                        | + | + | - | + | + | - | + |
| BAD_1626 | 16S rRNA methyltransferase GidB                              | + | + | - | + | + | - | + |
