# Supplementary material
Source: PubMed Central journal article supplement (PMC3536097)
Supplement: AEM.02467-12_zam999103955so2.pdf [file AEM.02467-12_zam999103955so2.pdf]

**Table S2:** List of variable genes identified in the genomes of *B. catenulatum*/*B. pseudocatenulatum* strains through

CGH experiments

| ORF             | Product                                                   | DSM20438 | 202B | 249B | 318B | 853B | DSM16992 | 660-1 | 660-7 | 676 | MB271 |
|-----------------|-----------------------------------------------------------|----------|------|------|------|------|----------|-------|-------|-----|-------|
| BIFPSEUDO_02358 | phosphoribosyl isomerase                                  | +        | +    | +    | +    | +    | -        | +     | -     | +   | +     |
| BIFPSEUDO_02359 | carbohydrate kinase                                       | +        | +    | +    | +    | +    | -        | -     | +     | +   | +     |
| BIFPSEUDO_02360 | kB family carbohydrate kinase                             | +        | +    | +    | +    | +    | -        | +     | -     | +   | +     |
| BIFPSEUDO_02361 | sulfatase                                                 | +        | +    | +    | +    | +    | +        | +     | -     | +   | +     |
| BIFPSEUDO_02365 | NADPH:quinone oxidoreductases or alcohol dehydrogenase    | +        | +    | +    | +    | +    | -        | +     | -     | -   | +     |
| BIFPSEUDO_02369 | putative transport protein of outer membrane lipoproteins | +        | +    | +    | +    | +    | +        | -     | +     | -   | -     |
| BIFPSEUDO_02370 | hypothetical protein prot                                 | +        | +    | +    | +    | +    | +        | -     | +     | +   | +     |
| BIFPSEUDO_02374 | putative ATP-binding component of an ABC transporter      | +        | +    | +    | +    | -    | +        | +     | +     | +   | +     |
| BIFPSEUDO_02392 | translation elongation factors                            | +        | +    | +    | +    | +    | +        | +     | +     | +   | -     |
| BIFPSEUDO_02394 | hypothetical protein                                      | +        | +    | +    | +    | +    | -        | +     | +     | +   | -     |
| BIFPSEUDO_02395 | hypothetical protein                                      | +        | +    | +    | +    | +    | +        | +     | +     | -   | +     |
| BIFPSEUDO_02408 | oligopeptide transport protein of the ABC superfamily     | +        | -    | +    | +    | +    | +        | +     | +     | -   | +     |
| BIFPSEUDO_02409 | peptide ABC transporter permease                          | +        | +    | +    | +    | +    | -        | +     | +     | +   | +     |
| BIFPSEUDO_02410 | ABC peptide transporter, permease component               | +        | -    | +    | +    | -    | -        | -     | -     | -   | +     |
| BIFPSEUDO_02411 | hypothetical protein                                      | +        | +    | +    | +    | -    | +        | +     | +     | -   | +     |
| BIFPSEUDO_02415 | two-component system histidine kinase                     | +        | -    | +    | +    | +    | +        | +     | +     | +   | +     |
| BIFPSEUDO_02418 | LysR-type transcriptional regulators                      | +        | -    | +    | -    | +    | +        | +     | +     | +   | +     |
| BIFPSEUDO_02420 | beta-galactosidase I                                      | +        | +    | +    | +    | +    | -        | +     | -     | +   | -     |
| BIFPSEUDO_02421 | binding-protein-dependent transport systems               | +        | +    | +    | -    | -    | -        | -     | -     | -   | -     |
| BIFPSEUDO_02422 | ABC transporter                                           | +        | +    | +    | -    | -    | +        | +     | -     | +   | +     |
| BIFPSEUDO_02423 | ABC transporter ATP-binding protein                       | +        | +    | +    | -    | -    | +        | +     | -     | +   | -     |
| BIFPSEUDO_02436 | FtsX-like protein involved in cell division               | +        | +    | +    | +    | +    | -        | +     | -     | +   | +     |
| BIFPSEUDO_02437 | ATPase involved in cell division                          | +        | +    | +    | +    | -    | -        | -     | -     | -   | -     |
| BIFPSEUDO_02438 | peptide chain release factor RF2                          | +        | -    | +    | +    | -    | +        | +     | -     | +   | +     |
| BIFPSEUDO_02439 | hypothetical protein                                      | +        | +    | +    | +    | +    | -        | +     | -     | +   | +     |
| BIFPSEUDO_02440 | hypothetical protein                                      | +        | +    | +    | +    | +    | +        | +     | -     | +   | -     |
| BIFPSEUDO_02457 | ABC-type transporter, ATPase and permease components      | +        | +    | +    | +    | +    | -        | +     | -     | +   | +     |
| BIFPSEUDO_02458 | hypothetical protein                                      | +        | +    | +    | +    | +    | +        | +     | -     | +   | +     |
| BIFPSEUDO_02459 | serine/threonine protein kinase                           | +        | +    | +    | +    | +    | -        | -     | -     | -   | -     |
| BIFPSEUDO_02460 | methyltransferase                                         | +        | +    | +    | +    | +    | +        | +     | -     | +   | +     |
| BIFPSEUDO_02479 | predicted transcriptional regulator                       | +        | +    | +    | +    | +    | +        | -     | +     | +   | +     |
| BIFPSEUDO_02482 | hypothetical protein                                      | +        | +    | +    | +    | +    | -        | +     | +     | +   | +     |
| BIFPSEUDO_02483 | ABC superfamily ATP binding cassette transporter          | +        | +    | +    | +    | +    | +        | +     | -     | +   | +     |
| BIFPSEUDO_02485 | hypothetical protein                                      | +        | +    | +    | +    | +    | +        | -     | +     | +   | +     |
| BIFPSEUDO_02491 | putative sialate O-acetyltransferase                      | +        | +    | +    | +    | +    | -        | +     | -     | +   | +     |
| BIFPSEUDO_02496 | glycine betaine/L-proline ABC transporter                 | +        | +    | +    | +    | -    | +        | -     | +     | +   | -     |
| BIFPSEUDO_02497 | binding-protein-dependent transport protein               | +        | +    | +    | +    | +    | -        | +     | +     | +   | -     |
| BIFPSEUDO_02498 | sugar-binding lipoprotein                                 | +        | +    | +    | +    | +    | -        | +     | -     | -   | -     |

|                 |                                                              |   |   |   |   |   |   |   |   |   |   |
|-----------------|--------------------------------------------------------------|---|---|---|---|---|---|---|---|---|---|
| BIFPSEUDO_02504 | acyl-CoA thioesterase II                                     | + | - | - | + | + | + | + | + | + | + |
| BIFPSEUDO_02512 | D-alanyl-D-alanine carboxypeptidase                          | + | - | + | - | + | + | + | + | + | + |
| BIFPSEUDO_02518 | putative cyclic diguanylate phosphodiesterase domain protein | + | + | - | + | + | + | + | + | + | + |
| BIFPSEUDO_02519 | hypothetical protein                                         | + | + | - | + | - | - | - | - | - | - |
| BIFPSEUDO_02520 | Polyphosphate(polyP) polymerase                              | + | + | - | + | + | + | + | - | + | + |
| BIFPSEUDO_02523 | group 1 glycosyl transferase                                 | + | + | - | + | + | + | + | + | - | + |
| BIFPSEUDO_02524 | membrane protein                                             | + | + | + | + | + | - | + | - | + | - |
| BIFPSEUDO_02538 | OsmC-like protein                                            | + | + | + | + | + | - | + | - | - | - |
| BIFPSEUDO_02544 | hypothetical protein                                         | + | + | + | + | - | - | + | - | + | - |
| BIFPSEUDO_02551 | putative alpha/beta superfamily hydrolase                    | + | - | + | - | + | - | - | - | - | - |
| BIFPSEUDO_02553 | sugar (Glycoside-Pentoside-Hexuronide) transporter           | + | - | + | - | + | + | + | + | + | + |
| BIFPSEUDO_02555 | LacI transcriptional regulators                              | + | - | + | - | + | + | + | + | + | + |
| BIFPSEUDO_02566 | transcriptional regulator, GntR family                       | + | - | + | - | - | - | + | + | + | + |
| BIFPSEUDO_02569 | putative homoserine kinase type II                           | + | - | + | - | - | - | + | - | - | - |
| BIFPSEUDO_02581 | hypothetical protein                                         | + | + | + | + | + | - | - | - | - | - |
| BIFPSEUDO_02594 | hypothetical protein                                         | + | - | - | - | + | + | + | + | + | + |
| BIFPSEUDO_02596 | Conserved hypothetical protein transglutaminase family       | + | + | - | - | + | + | + | + | + | + |
| BIFPSEUDO_02635 | hypothetical protein                                         | + | + | + | + | + | + | + | - | + | + |
| BIFPSEUDO_02643 | predicted dehydrogenase                                      | + | + | + | + | + | - | + | - | - | - |
| BIFPSEUDO_02653 | beta-1,4-xylosidase                                          | + | - | - | + | + | + | + | + | + | + |
| BIFPSEUDO_02654 | dipeptide ABC transporter                                    | + | - | - | - | + | + | + | + | + | + |
| BIFPSEUDO_02655 | fused ATPase and permease components of ABC-type             | + | - | - | - | + | + | + | + | + | + |
| BIFPSEUDO_02657 | ABC-type dipeptide/oligopeptide/nickel transport system      | + | - | - | - | + | + | + | + | + | + |
| BIFPSEUDO_02658 | acetate kinase                                               | + | - | - | - | + | + | + | + | + | + |
| BIFPSEUDO_02660 | probable ferredoxin FdxC                                     | + | - | + | - | + | + | + | + | + | + |
| BIFPSEUDO_02662 | UDP-N-acetylenolpyruvoylglucosamine reductase                | + | - | + | - | + | + | + | + | + | + |
| BIFPSEUDO_02672 | 5,10-methenyltetrahydrofolate synthetase                     | + | - | - | - | + | + | + | + | + | + |
| BIFPSEUDO_02674 | hypothetical protein                                         | + | - | + | - | + | + | + | + | + | + |
| BIFPSEUDO_02677 | beta-N-acetylglucosaminidase                                 | + | - | - | - | + | + | + | + | + | + |
| BIFPSEUDO_02681 | guanine-hypoxanthine permease                                | + | + | + | + | + | - | + | - | + | + |
| BIFPSEUDO_02687 | LysR-type transcriptional regulators                         | + | + | + | - | + | + | + | + | + | + |
| BIFPSEUDO_02693 | phospho-2-dehydro-3-deoxyheptonate aldolase                  | + | + | - | - | + | + | + | + | + | + |
| BIFPSEUDO_02702 | hypothetical protein                                         | + | - | - | - | + | + | + | + | + | + |
| BIFPSEUDO_02716 | biotin-[acetyl-CoA-carboxylase] ligase                       | + | + | + | + | + | + | - | + | - | + |
| BIFPSEUDO_02749 | nicotinate phosphoribosyltransferase                         | + | + | + | + | + | + | + | - | + | + |
| BIFPSEUDO_02753 | hypothetical protein                                         | + | + | + | + | - | - | - | - | - | - |
| BIFPSEUDO_02774 | hypothetical protein                                         | + | + | + | + | + | + | + | - | + | + |
| BIFPSEUDO_02780 | hypothetical protein                                         | + | + | - | + | - | - | - | - | + | - |
| BIFPSEUDO_02787 | putative 6-phosphogluconate dehydrogenase                    | + | - | - | + | - | - | - | - | - | - |
| BIFPSEUDO_02795 | ABC transporter ATP-binding protein                          | + | + | + | + | + | + | - | + | - | - |

|                 |                                                            |   |   |   |   |   |   |   |   |   |   |
|-----------------|------------------------------------------------------------|---|---|---|---|---|---|---|---|---|---|
| BIFPSEUDO_02796 | ABC transporter permease                                   | + | + | + | + | + | - | + | + | + | - |
| BIFPSEUDO_02798 | Solute binding protein of ABC transporter system           | + | + | + | + | + | - | + | - | + | - |
| BIFPSEUDO_02805 | hypothetical protein                                       | + | + | + | + | + | - | + | + | + | + |
| BIFPSEUDO_02808 | hypothetical protein                                       | + | + | + | + | - | - | - | - | - | - |
| BIFPSEUDO_02809 | IcIR-type transcriptional regulator                        | + | + | + | + | + | + | - | + | + | + |
| BIFPSEUDO_02810 | metallophosphatase superfamily                             | + | + | + | + | - | - | - | - | - | - |
| BIFPSEUDO_02819 | Major Facilitator Superfamily                              | + | + | + | + | - | - | - | - | - | - |
| BIFPSEUDO_02822 | formate--tetrahydrofolate ligase                           | + | + | + | + | - | + | + | + | + | + |
| BIFPSEUDO_02839 | hypothetical protein                                       | + | + | + | - | + | - | + | - | + | + |
| BIFPSEUDO_02841 | sugar permease of ABC transporter system                   | + | + | + | - | - | - | - | - | - | - |
| BIFPSEUDO_02842 | sugar ABC superfamily ATP binding cassette transporter     | + | + | + | - | + | + | - | - | - | - |
| BIFPSEUDO_02843 | COG1653: ABC-type sugar transport system                   | + | + | + | - | + | + | + | + | + | + |
| BIFPSEUDO_02845 | exo-alpha-L-arabinofuranosidase                            | + | + | - | - | + | - | + | - | - | - |
| BIFPSEUDO_02847 | transcriptional regulator, LacI family/carbohydrate kinase | + | + | + | + | - | - | - | - | - | - |
| BIFPSEUDO_02870 | hypothetical protein                                       | + | + | + | + | + | + | - | + | - | + |
| BIFPSEUDO_02872 | polyphosphate kinas                                        | + | + | + | + | - | + | - | + | - | - |
| BIFPSEUDO_02877 | alpha-L-arabinofuranosidase                                | + | + | + | + | + | - | - | - | - | - |
| BIFPSEUDO_02878 | zinc metalloprotease ZmpB, putative                        | + | + | + | + | - | + | + | + | + | + |
| BIFPSEUDO_02882 | ABC transporter, putative molybdenum transport system      | + | + | + | + | - | + | + | + | + | + |
| BIFPSEUDO_02885 | 2-polyprenylphenol 6-hydroxylase                           | + | - | - | + | + | + | + | + | + | + |
| BIFPSEUDO_02890 | replicative DNA helicase                                   | + | + | + | - | + | + | + | + | + | + |
| BIFPSEUDO_02900 | hyp prot BIFANG_02039                                      | + | + | + | + | + | - | + | - | - | + |
| BIFPSEUDO_02910 | conserved hyp prot                                         | + | - | + | + | + | + | + | + | + | + |
| BIFPSEUDO_02911 | hypothetical protein BIFADO_02088                          | + | - | - | - | + | + | + | + | + | - |
| BIFPSEUDO_02914 | possible peptidyl-prolyl cis-trans isomerase               | + | - | - | - | - | + | + | - | - | - |
| BIFPSEUDO_02926 | hypothetical protein BIFDEN_01759                          | + | + | + | + | - | - | - | - | - | - |
| BIFPSEUDO_02928 | DNA gyrase B subuni                                        | + | + | + | + | + | + | + | - | + | + |
| BIFPSEUDO_02934 | hypothetical protein BIFCAT_00541                          | + | + | + | - | + | - | + | + | + | + |
| BIFPSEUDO_02952 | pyridine transhydrogenase subunit                          | + | + | + | + | + | - | - | - | + | - |
| BIFPSEUDO_02954 | Response regulator                                         | + | + | + | + | - | - | + | + | + | + |
| BIFPSEUDO_02958 | ABC-type multidrug transport system                        | + | + | + | + | + | + | + | + | - | - |
| BIFPSEUDO_02961 | two component transcriptional regulator                    | + | + | + | + | + | + | + | + | + | - |
| BIFPSEUDO_02971 | ABC-type dipeptide/oligopeptide/nickel transport system    | + | + | - | + | + | + | + | - | + | + |
| BIFPSEUDO_02974 | oppA2 Oligopeptide-binding protein oppA                    | + | + | - | + | + | + | - | - | - | + |
| BIFPSEUDO_02975 | ABC-type oligopeptide transport system                     | + | + | + | + | + | - | + | - | + | - |
| BIFPSEUDO_02982 | sugar transporter                                          | + | + | + | + | + | - | + | - | + | + |
| BIFPSEUDO_02983 | Nudix_Hydrolase                                            | + | + | + | + | + | + | + | + | + | - |
| BIFPSEUDO_02995 | hypothetical protein BIFCAT_00471                          | + | - | - | + | + | + | + | + | + | + |
| BIFPSEUDO_02999 | FemAB family                                               | + | + | + | + | - | + | + | + | + | + |

|                 |                                                      |   |   |   |   |   |   |   |   |   |   |
|-----------------|------------------------------------------------------|---|---|---|---|---|---|---|---|---|---|
| BIFPSEUDO_03005 | oppD1 Oligopeptide transport ATP-binding             | + | + | + | + | + | + | + | + | + | - |
| BIFPSEUDO_03006 | ABC-ATPase subunit interface                         | + | + | + | + | + | + | + | - | + | - |
| BIFPSEUDO_03008 | Transcriptional regulator/sugar kinase               | + | + | + | + | + | - | + | - | + | + |
| BIFPSEUDO_03013 | UDP-N-acetylmuramate-L-alanine ligase                | + | + | - | + | + | + | + | + | + | + |
| BIFPSEUDO_03016 | UDP-N-acetylmuramoyl-L-alanyl-D-glutamate synthetase | + | - | - | - | + | + | + | + | + | + |
| BIFPSEUDO_03030 | putative transport system permease                   | + | + | + | + | + | - | + | - | + | + |
| BIFPSEUDO_03035 | hyp prot BIFADO_02223                                | + | + | + | + | + | + | + | - | + | + |
| BIFPSEUDO_03038 | ABC transporter component                            | + | + | + | + | + | + | + | - | + | - |
| BIFPSEUDO_03041 | dual-specificity protein kinase                      | + | + | + | + | - | - | - | - | - | - |
| BIFPSEUDO_03051 | possible lipoprotein signal peptidase                | + | + | + | + | + | - | + | - | + | - |
| BIFPSEUDO_03058 | hyp prot BIFADO_02257                                | + | + | + | + | + | - | + | - | + | + |
| BIFPSEUDO_03061 | prepilin signal peptidase                            | + | + | + | + | + | - | + | - | + | + |
| BIFPSEUDO_03063 | Bacterial type II secretion system protein F domain  | + | + | - | + | + | + | + | + | + | + |
| BIFPSEUDO_03069 | pilus retraction ATPase PilT                         | + | + | - | + | - | - | - | - | - | - |
| BIFPSEUDO_03071 | 4-methyl-5-beta-hydroxyethylthiazole                 | + | + | - | + | - | - | - | - | - | - |
| BIFPSEUDO_03080 | Solute binding protein of ABC transporter            | + | + | + | + | + | - | - | + | - | - |
| BIFPSEUDO_03110 | hypothetical protein                                 | + | + | + | + | + | - | + | - | + | - |
| BIFPSEUDO_03112 | CRISPR/Cas system-associated protein Cas2            | + | + | + | + | + | - | - | - | - | - |
| BIFPSEUDO_03113 | CRISPR/Cas system-associated protein Cas1            | + | + | + | + | + | - | - | - | - | - |
| BIFPSEUDO_03115 | CRISPR-associated Csh2 family protein                | + | + | + | + | + | - | - | - | + | + |
| BIFPSEUDO_03116 | CRISPR-associated protein Cas8c/Csd1                 | + | + | + | + | + | - | - | - | - | - |
| BIFPSEUDO_03118 | CRISPR-associated helicase Cas3                      | + | + | + | + | + | + | + | - | + | + |
| BIFPSEUDO_03119 | putative CRISPR-associated helicase                  | + | + | + | + | - | - | - | - | - | - |
| BIFPSEUDO_03134 | tetR-type transcriptional regulator                  | + | + | + | + | + | - | + | + | + | + |
| BIFPSEUDO_03136 | ligase/carboxylase and argininosuccinate lyase       | + | + | - | - | + | + | + | + | + | + |
| BIFPSEUDO_03142 | The Major Facilitator Superfamily (MFS)              | + | - | - | - | - | - | - | + | - | - |
| BIFPSEUDO_03145 | glucosylceramidase                                   | + | + | - | - | + | + | + | + | + | + |
| BIFPSEUDO_03170 | MutT/nudix family protein                            | + | - | + | + | - | - | - | - | + | + |
| BIFPSEUDO_03172 | putative transposase, IS891/IS1136/IS1341 family     | + | - | - | + | + | + | - | + | + | - |
| BIFPSEUDO_03173 | transposase IS200-family protein                     | + | - | - | + | - | - | - | - | - | + |
| BIFPSEUDO_03174 | helicases of superfamily II                          | + | - | + | + | + | + | - | - | - | + |
| BIFPSEUDO_03180 | hyp prot BIFCAT_00317                                | + | + | + | + | + | + | + | - | + | + |
| BIFPSEUDO_03181 | hypothetical protein                                 | + | + | + | + | + | + | + | + | + | - |
| BIFPSEUDO_03185 | beta-galactosidase                                   | + | + | + | + | + | - | - | - | - | - |
| BIFPSEUDO_03190 | hypothetical protein                                 | + | + | + | + | + | + | - | + | - | + |
| BIFPSEUDO_03192 | putative transport protein                           | + | + | + | + | + | + | + | + | - | + |
| BIFPSEUDO_03202 | hyp prot BIFCAT_01424                                | + | + | - | - | + | + | + | + | + | + |
| BIFPSEUDO_03203 | Sortase C                                            | + | + | - | - | + | + | + | + | + | + |
| BIFPSEUDO_03204 | hyp prot BIFCAT_01422                                | + | + | - | - | + | + | + | + | + | + |
| BIFPSEUDO_03205 | EntS/YbdA MFS transporter                            | + | + | - | - | + | + | + | + | + | + |

|                 |                                                            |   |   |   |   |   |   |   |   |   |   |
|-----------------|------------------------------------------------------------|---|---|---|---|---|---|---|---|---|---|
| BIFPSEUDO_03217 | Glycosyl hydrolases family 2                               | + | + | - | + | + | + | + | + | + | + |
| BIFPSEUDO_03218 | LacI-type transcriptional regulator                        | + | + | - | - | - | + | + | + | + | + |
| BIFPSEUDO_03219 | hyp prot BLJ_0327                                          | + | + | - | - | - | - | - | - | - | - |
| BIFPSEUDO_03221 | amidohydrolase 2                                           | + | + | - | - | + | + | + | + | + | - |
| BIFPSEUDO_03223 | mandelate racemase/muconate lactonizing enzyme             | + | + | - | - | - | - | - | - | + | - |
| BIFPSEUDO_03224 | extracellular solute-binding protein, family 1             | + | + | - | - | - | + | - | + | - | - |
| BIFPSEUDO_03225 | binding-protein-dependent transport systems                | + | + | - | - | - | - | - | - | - | - |
| BIFPSEUDO_03226 | binding-protein-dependent transport systems                | + | + | - | + | + | - | + | - | + | + |
| BIFPSEUDO_03227 | periplasmic-binding protein/LacI transcriptional regulator | + | + | - | - | - | + | + | + | - | - |
| BIFPSEUDO_03228 | Type 1 glutamine amidotransferase                          | + | + | - | - | - | - | - | + | - | - |
| BIFPSEUDO_03229 | LysR-type transcriptional regulators                       | + | + | + | + | + | - | + | + | + | + |
| BIFPSEUDO_03230 | LacI-family transcriptional regulator                      | + | + | - | - | + | + | + | + | + | + |
| BIFPSEUDO_03232 | Glycosidases                                               | + | + | + | - | + | + | + | + | - | - |
| BIFPSEUDO_03235 | Beta-galactosidase                                         | + | + | + | + | + | + | + | - | + | - |
| BIFPSEUDO_03237 | hypothetical protein                                       | + | + | - | - | - | - | - | - | - | - |
| BIFPSEUDO_03238 | Mn2+ and Fe2+ transporters                                 | + | + | + | - | + | + | - | + | - | + |
| BIFPSEUDO_03239 | hypothetical protein                                       | + | + | - | - | - | - | + | + | + | + |
| BIFPSEUDO_03240 | Aldo-keto reductases                                       | + | + | + | - | + | + | + | + | + | + |
| BIFPSEUDO_03245 | Exonuclease-Endonuclease-Phosphatase (EEP)                 | + | + | + | + | - | - | - | - | - | - |
| BIFPSEUDO_03249 | abi-like protein                                           | + | + | + | + | + | - | + | + | + | + |
| BIFPSEUDO_03251 | lysyl-tRNA synthetase                                      | + | + | - | + | + | - | + | + | + | + |
| BIFPSEUDO_03254 | UDP-GalNAc:betaGlcNAc                                      | + | - | - | + | + | - | + | - | + | - |
| BIFPSEUDO_03256 | Nitroreductase                                             | + | - | - | + | - | - | - | - | - | - |
| BIFPSEUDO_03257 | Polysaccharide pyruvyl transferase                         | + | + | - | + | - | - | - | - | - | - |
| BIFPSEUDO_03258 | putative maltose O-acetyltransferase                       | + | - | - | + | - | - | - | - | - | - |
| BIFPSEUDO_03259 | putative glycosyltransferase                               | + | - | - | + | - | - | - | - | - | - |
| BIFPSEUDO_03260 | MatE                                                       | + | - | - | + | - | - | - | - | - | - |
| BIFPSEUDO_03261 | glycosyltransferase                                        | + | + | - | + | - | - | - | - | - | - |
| BIFPSEUDO_03262 | spore coat protein                                         | + | + | - | + | + | + | + | + | + | + |
| BIFPSEUDO_03264 | WblC                                                       | + | + | - | - | - | - | - | - | - | - |
| BIFPSEUDO_03265 | Cell envelope biogenesis                                   | + | + | - | - | + | + | + | + | + | + |
| BIFPSEUDO_03267 | Capsular polysaccharide synthesis protein                  | + | - | - | - | - | - | - | - | - | - |
| BIFPSEUDO_03268 | ligase RfaL                                                | + | - | - | - | - | - | - | + | - | - |
| BIFPSEUDO_03271 | Polysaccharide pyruvyl transferase                         | + | - | - | - | + | - | - | - | - | - |
| BIFPSEUDO_03274 | Membrane protein                                           | + | - | - | - | - | - | - | - | - | - |
| BIFPSEUDO_03276 | putative transposase                                       | + | - | + | - | + | + | + | + | + | + |
| BIFPSEUDO_03278 | hyp prot                                                   | + | - | + | - | + | + | + | + | + | + |
| BIFPSEUDO_03282 | putative transcriptional regulator                         | + | - | - | - | + | - | - | - | - | - |
| BIFPSEUDO_03283 | hyp prot BIFADO_01854                                      | + | - | + | - | - | + | + | + | + | + |
| BIFPSEUDO_03285 | hyp prot                                                   | + | - | + | + | - | + | + | + | + | + |

|                 |                                               |   |   |   |   |   |   |   |   |   |   |
|-----------------|-----------------------------------------------|---|---|---|---|---|---|---|---|---|---|
| BIFPSEUDO_03286 | hyp prot BIFCAT_01216                         | + | - | + | - | - | - | - | - | - | - |
| BIFPSEUDO_03289 | Fic/DOC family                                | + | - | - | - | - | + | + | + | + | + |
| BIFPSEUDO_03290 | hypothetical protein BIFCAT_01189             | + | - | + | - | + | + | + | + | + | + |
| BIFPSEUDO_03291 | hypothetical protein                          | + | - | + | - | - | + | + | + | + | + |
| BIFPSEUDO_03292 | hypothetical protein BIFCAT_01188             | + | - | - | + | + | + | + | + | + | + |
| BIFPSEUDO_03294 | glycosyl hydrolase                            | + | - | + | + | - | - | - | - | - | - |
| BIFPSEUDO_03295 | carbohydrate ABC transporter membrane protein | + | - | + | + | - | - | - | - | - | - |
| BIFPSEUDO_03296 | sugar ABC transporter permease                | + | - | + | + | - | - | - | - | - | - |
| BIFPSEUDO_03297 | family 1 extracellular solute-binding protein | + | - | + | + | - | - | - | - | - | - |
| BIFPSEUDO_03298 | regulatory protein LacI                       | + | - | + | + | - | - | - | - | - | - |
| BIFPSEUDO_03303 | Sugar-binding protein of ABC transporter      | + | + | + | + | - | - | - | - | - | - |
| BIFPSEUDO_03309 | transcriptional regulator                     | + | + | + | + | + | - | + | - | + | + |
| BIFPSEUDO_03310 | predicted protein                             | + | + | + | + | + | - | + | + | + | + |
| BIFPSEUDO_03311 | Alpha amylase                                 | + | + | + | + | + | - | + | + | + | + |
| BIFPSEUDO_03313 | glycosyltransferase                           | + | + | + | + | + | - | + | - | + | - |
| BIFPSEUDO_03321 | alpha-amylase                                 | + | + | + | + | + | - | + | + | + | + |
| BIFPSEUDO_03331 | glycine cleavage system protein H             | + | - | + | + | + | + | + | + | + | + |
| BIFPSEUDO_03343 | hypothetical protein                          | + | + | + | + | + | + | + | + | + | - |
| BIFPSEUDO_03348 | hypothetical protein BIFDEN_01361             | + | + | + | + | + | - | + | - | + | + |
| BIFPSEUDO_03359 | FHA domain-containing protein                 | + | + | + | + | + | - | + | - | + | + |
| BIFPSEUDO_03379 | hypothetical protein                          | + | + | - | + | - | - | + | + | + | + |
| BIFPSEUDO_03380 | hypothetical protein                          | + | + | + | + | - | - | + | + | + | + |
| BIFPSEUDO_03381 | hypothetical protein                          | + | + | - | + | + | - | - | - | - | - |
| BIFPSEUDO_03382 | hyp prot BIFDEN_01597                         | + | + | + | + | + | + | + | + | + | - |
| BIFPSEUDO_03383 | hypothetical protein                          | + | + | - | + | - | - | - | - | - | - |
| BIFPSEUDO_03388 | hyp prot BIFDEN_01603                         | + | + | - | + | - | - | - | - | - | - |
| BIFPSEUDO_03390 | hyp prot BIFDEN_01604                         | + | + | - | + | + | + | - | + | - | + |
| BIFPSEUDO_03391 | transRDD family protein                       | + | + | - | + | - | - | + | - | + | - |
| BIFPSEUDO_03407 | hypothetical protein BIFCAT_00302             | + | - | - | + | + | + | + | + | + | + |
| BIFPSEUDO_03409 | type I restriction-modification system        | + | - | - | + | + | + | + | + | + | + |
| BIFPSEUDO_03411 | type I restriction modification system        | + | - | - | + | + | + | + | + | + | + |
| BIFPSEUDO_03421 | hypothetical protein BIFCAT_01101             | + | - | - | - | + | + | + | + | + | + |
| BIFPSEUDO_03427 | short-chain dehydrogenase/reductase           | + | + | + | + | + | - | + | - | + | + |
| BIFPSEUDO_03434 | tyrosyl-tRNA(Tyr) deacylase                   | + | - | - | + | - | - | - | - | - | - |
| BIFPSEUDO_03435 | hypothetical protein BIFCAT_01080             | + | + | + | + | + | - | + | - | + | + |
| BIFPSEUDO_03436 | anchored-chain amino acid transport           | + | + | + | + | + | - | + | - | + | + |
| BIFPSEUDO_03443 | ptidyl-tRNA hydrolase                         | + | + | + | + | + | + | + | + | + | - |
| BIFPSEUDO_03468 | hypothetical protein BIFCAT_01048             | + | + | + | + | + | + | + | - | + | + |
| BIFPSEUDO_03473 | hypothetical protein BIFCAT_01043             | + | + | + | + | + | - | + | + | + | - |
| BIFPSEUDO_03476 | methylenetetrahydrofolate dehydrogenase       | + | + | + | + | - | + | - | + | - | - |
| BIFPSEUDO_03485 | tyryl-CoA dehydrogenase                       | + | + | + | + | + | - | + | + | + | + |

|                 |                                                                     |   |   |   |   |   |   |   |   |   |   |
|-----------------|---------------------------------------------------------------------|---|---|---|---|---|---|---|---|---|---|
| BIFPSEUDO_03486 | hypothetical protein BIFCAT_01029                                   | + | + | + | + | + | + | + | + | - | + |
| BIFPSEUDO_03503 | tetracycline resistance protein TetW                                | + | - | - | - | + | - | - | - | - | - |
| BIFPSEUDO_03504 | mobilization protein                                                | + | + | - | - | + | + | + | + | - | + |
| BIFPSEUDO_03505 | hypothetical protein                                                | + | - | - | - | - | + | - | + | - | - |
| BIFPSEUDO_03506 | hyp prot                                                            | + | - | - | - | - | - | - | - | - | - |
| BIFPSEUDO_03507 | phage-related integrases                                            | + | - | + | - | + | + | + | + | + | + |
| BIFPSEUDO_03525 | phosphoglycerate mutase family                                      | + | + | + | + | + | - | + | - | - | - |
| BIFPSEUDO_03543 | NifS-like aminotranferase                                           | + | + | + | + | + | - | + | + | + | + |
| BIFPSEUDO_03551 | diadenosine tetraphosphate                                          | + | + | + | + | + | + | + | - | - | + |
| BIFPSEUDO_03554 | putative transport protein                                          | + | + | + | + | + | + | + | - | + | + |
| BIFPSEUDO_03577 | hypothetical protein                                                | + | + | + | + | + | + | + | - | + | + |
| BIFPSEUDO_03589 | 3-oxoacyl-[acyl-carrier protein] reductase                          | + | + | + | + | + | - | + | - | - | + |
| BIFPSEUDO_03592 | carbonate dehydratase                                               | + | + | + | + | + | - | + | - | + | + |
| BIFPSEUDO_03599 | putative protein-L-isoaspartate methyltransferase                   | + | + | + | + | + | + | + | - | + | + |
| BIFPSEUDO_03634 | glutamate-aspartate symport protein                                 | + | + | + | + | + | - | - | - | + | - |
| BIFPSEUDO_03640 | hypothetical protein                                                | + | + | + | - | + | - | - | - | + | - |
| BIFPSEUDO_03661 | hypothetical protein                                                | + | - | + | - | + | + | + | + | + | + |
| BIFPSEUDO_03673 | membrane spanning protein TolA                                      | + | + | + | + | + | + | + | + | - | + |
| BIFPSEUDO_03674 | membrane spanning protein TolA                                      | + | + | + | + | + | - | + | - | + | + |
| BIFPSEUDO_03679 | IMP dehydrogenase 1/CBS domain protein                              | + | + | + | + | + | + | + | + | - | + |
| BIFPSEUDO_03681 | probable pyrazinamidase/nicotinamidase                              | + | + | + | + | + | - | + | + | + | + |
| BIFPSEUDO_03685 | hypothetical protein BIFCAT_00771                                   | + | + | + | + | - | + | + | + | - | - |
| BIFPSEUDO_03686 | glycine betaine/L-proline ABC transporter                           | + | + | + | + | + | - | + | + | + | + |
| BIFPSEUDO_03697 | Preprotein translocase SecE subunit                                 | + | + | + | + | + | + | + | - | + | + |
| BIFPSEUDO_03698 | Cof-like hydrolase                                                  | + | + | + | + | + | + | + | - | + | + |
| BIFPSEUDO_03700 | hypothetical protein                                                | + | + | + | + | + | - | + | - | + | + |
| BIFPSEUDO_03701 | Nicotinamide mononucleotide transporter                             | + | + | + | + | - | - | - | + | - | - |
| BIFPSEUDO_03703 | transcriptional regulator                                           | + | + | + | + | + | - | + | - | + | + |
| BIFPSEUDO_03720 | adenylate/guanylate cyclase                                         | + | + | + | + | - | + | + | + | - | + |
| BIFPSEUDO_03721 | MerR superfamily                                                    | + | + | + | + | - | - | - | - | - | - |
| BIFPSEUDO_03722 | hyp prot BIFCAT_00746                                               | + | + | + | + | - | - | - | - | - | - |
| BIFPSEUDO_03723 | haloacid dehalogenase-like family                                   | + | + | + | + | + | - | - | - | - | + |
| BIFPSEUDO_03731 | hyp prot BIFCAT_00730                                               | + | + | + | + | + | - | + | - | + | + |
| BIFPSEUDO_03737 | succinyl-CoA synthetase alpha chain                                 | + | + | + | + | + | + | + | - | - | - |
| BIFPSEUDO_03745 | putative phosphatidylinositol synthase                              | + | + | + | + | + | + | + | - | + | + |
| BIFPSEUDO_03750 | CDP-diacylglycerol--glycerol-3-phosphate 3-phosphatidyl-transferase | + | + | + | + | + | - | - | - | - | - |
| BIFPSEUDO_03751 | ATP phosphoribosyltransferase                                       | + | + | + | + | + | - | + | - | - | + |
| BIFPSEUDO_03774 | hyp prot BIFCAT_00688                                               | + | + | + | + | + | + | + | - | + | + |
| BIFPSEUDO_03794 | acetamidase/formamidase family protein                              | + | + | + | + | + | - | - | + | + | + |
| BIFPSEUDO_03800 | phosphatase                                                         | + | + | + | + | + | - | + | - | - | - |
| BIFPSEUDO_03809 | tRNA synthetase RNA-binding domain                                  | + | + | + | + | + | + | + | - | + | + |

|                 |                                                         |   |   |   |   |   |   |   |   |   |   |
|-----------------|---------------------------------------------------------|---|---|---|---|---|---|---|---|---|---|
| BIFPSEUDO_03810 | hyp prot BIFADO_01947                                   | + | + | + | + | - | - | + | + | + | + |
| BIFPSEUDO_03812 | Metal dependent phosphohydrolases                       | + | + | + | + | - | - | - | - | - | - |
| BIFPSEUDO_03821 | argC N-acetyl-gamma-glutamyl-phosphate reductase        | + | + | + | + | + | - | + | + | + | + |
| BIFPSEUDO_03826 | hypothetical protein                                    | + | - | - | + | - | - | - | - | - | - |
| BIFPSEUDO_03830 | conserved hyp prot                                      | + | + | + | + | + | - | - | + | + | + |
| BIFPSEUDO_03832 | hypothetical protein                                    | + | + | + | + | + | + | + | - | + | + |
| BIFPSEUDO_03835 | putative DNA methyltransferase                          | + | + | + | + | + | + | + | + | - | - |
| BIFPSEUDO_03843 | Sodium:dicarboxylate symporter family                   | + | - | + | + | + | + | + | + | + | + |
| BIFPSEUDO_03844 | putative ABC transport protein                          | + | - | + | - | + | + | + | + | + | + |
| BIFPSEUDO_03845 | ABC-type cobalt transport system                        | + | - | + | + | + | + | + | + | + | + |
| BIFPSEUDO_03877 | ATP-dependent DNA helicase                              | + | - | + | + | + | + | + | + | + | + |
| BIFPSEUDO_03880 | hypothetical protein BIFANG_02761                       | + | + | - | - | + | - | + | - | - | - |
| BIFPSEUDO_03883 | putative DNA helicase II                                | + | - | - | - | + | + | + | + | + | + |
| BIFPSEUDO_03884 | hypothetical protein BLJ_0932                           | + | + | - | + | + | + | - | - | - | - |
| BIFPSEUDO_03891 | two-component sensor histidine kinase                   | + | + | + | + | + | - | + | - | - | - |
| BIFPSEUDO_03894 | putative Ser/Thr protein kinase                         | + | + | - | + | + | - | + | + | - | + |
| BIFPSEUDO_03896 | ABC-type multidrug transport system,                    | + | + | - | + | - | - | - | - | - | - |
| BIFPSEUDO_03909 | Metal-dependent amidase/aminoacylase/carboxypeptidase   | + | + | - | + | + | + | + | + | + | + |
| BIFPSEUDO_03910 | Cof-like hydrolase                                      | + | - | + | + | + | + | + | + | + | + |
| BIFPSEUDO_03912 | ABC metal ion transporter                               | + | + | - | + | + | + | + | + | + | + |
| BIFPSEUDO_03914 | hyp prot BIFCAT_00567                                   | + | - | + | + | + | + | + | + | + | + |
| BIFPSEUDO_03917 | hyp prot BLJ_1149                                       | + | - | + | + | + | + | + | + | + | + |
| BIFPSEUDO_03920 | hypothetical protein                                    | + | - | - | + | + | + | + | + | + | + |
| BIFPSEUDO_03923 | conserved hyp prot                                      | + | - | - | - | - | - | + | + | - | - |
| BIFPSEUDO_03925 | filamentation induced by cAMP protein Fic               | + | + | + | + | + | - | + | + | + | + |
| BIFPSEUDO_03926 | hypothetical protein BLJ_1159                           | + | + | + | + | + | + | + | + | - | + |
| BIFPSEUDO_03928 | hyp prot Blon_0981                                      | + | - | - | + | - | - | - | - | + | + |
| BIFPSEUDO_03932 | toxin-antitoxin system, antitoxin component, Xre family | + | + | + | + | + | - | + | - | - | - |
| BIFPSEUDO_03937 | putative Gas vesicle protein                            | + | + | - | + | + | - | + | - | + | - |
| BIFPSEUDO_03940 | conserved hyp prot                                      | + | - | + | + | + | - | + | + | + | + |
| BIFPSEUDO_03955 | transfer complex protein                                | + | - | - | + | - | - | - | + | + | - |
| BIFPSEUDO_03960 | ATPase central domain-containing protein                | + | - | + | + | + | + | + | + | + | + |
| BIFPSEUDO_03967 | hypothetical protein                                    | + | + | + | + | + | - | + | + | + | + |
| BIFPSEUDO_03988 | ParB-like partition proteins                            | + | + | + | + | + | - | + | - | - | - |
| BIFPSEUDO_03991 | hypothetical protein BIFCAT_00030                       | + | + | + | + | + | + | + | + | - | - |
| BIFPSEUDO_04002 | DNA gyrase subunit B, novobiocin-sensitive              | + | + | + | + | + | - | + | + | + | + |
| BIFPSEUDO_04010 | metal-dependent hydrolase                               | + | + | + | + | - | + | + | - | + | + |
| BIFPSEUDO_04015 | U ribosomal protein S8P                                 | + | + | + | + | + | - | + | - | + | - |
| BIFPSEUDO_04029 | hypothetical protein BIFCAT_00070                       | + | + | + | + | + | - | + | - | + | - |
| BIFPSEUDO_04031 | Sortase D                                               | + | + | + | + | - | + | + | + | - | - |



|                 |                                                            |   |   |   |   |   |   |   |   |   |   |
|-----------------|------------------------------------------------------------|---|---|---|---|---|---|---|---|---|---|
| BIFPSEUDO_04032 | hypothetical protein                                       | + | + | + | + | - | + | + | + | + | + |
| BIFPSEUDO_04035 | serine/threonine-protein kinase                            | + | - | + | + | + | + | + | + | + | + |
| BIFPSEUDO_04043 | sensor histidine kinase                                    | + | + | + | + | + | - | + | - | + | - |
| BIFPSEUDO_04048 | putative NADH-flavin reductase                             | + | + | - | + | - | + | - | + | + | + |
| BIFPSEUDO_04053 | E1-E2_ATPase                                               | + | + | - | + | + | - | - | - | + | - |
| BIFPSEUDO_04055 | aromatic amino acid transport protein                      | + | - | + | - | - | + | + | + | + | + |
| BIFPSEUDO_04061 | Xre-type transcriptional regulator                         | + | + | - | + | - | - | - | - | - | - |
| BIFPSEUDO_04062 | glycosyl transferase                                       | + | + | + | + | - | + | + | + | + | + |
| BIFPSEUDO_04075 | hypothetical membrane-spanning protein                     | + | + | + | + | + | - | - | - | - | - |
| BIFPSEUDO_04077 | BC-type polysaccharide transport system                    | + | + | + | + | + | + | + | + | - | - |
| BIFPSEUDO_04078 | ABC-type polysaccharide transport system                   | + | + | + | + | + | - | + | + | + | - |
| BIFPSEUDO_04079 | sugar ABC uptake system, permease component""              | + | + | + | + | + | - | - | - | - | - |
| BIFPSEUDO_04092 | hypothetical protein                                       | + | + | + | + | + | + | - | + | + | + |
| BIFPSEUDO_04093 | hyp prot BAD_0085                                          | + | + | + | + | + | + | + | - | - | - |
| BIFPSEUDO_04095 | H(+)-transporting two-sector ATPase                        | + | + | + | + | - | - | - | - | - | - |
| BIFPSEUDO_04096 | hyp prot BIFCAT_00124                                      | + | + | + | + | + | - | + | + | + | + |
| BIFPSEUDO_04099 | sortase                                                    |   | - | + | - | - | - | - | + | - | - |
| BIFPSEUDO_04100 | fimbrial subunit                                           | + | + | + | + | - | - | - | + | - | - |
| BIFPSEUDO_04101 | hyp prot                                                   | + | + | + | + | + | - | + | - | - | - |
| BIFPSEUDO_04102 | fimbrial subunit FimA                                      | + | + | + | + | - | + | + | + | + | + |
| BIFPSEUDO_04104 | hyp prot                                                   | + | + | + | + | - | - | - | - | - | - |
| BIFPSEUDO_04112 | MarR-type transcriptional regulator                        | + | - | + | - | + | + | + | + | + | + |
| BIFPSEUDO_04113 | ABC-type multidrug transport system                        | + | - | + | - | + | + | + | + | + | + |
| BIFPSEUDO_04115 | hyp prot BIFCAT_00139                                      | + | - | + | - | + | + | + | + | + | + |
| BIFPSEUDO_04133 | hyp prot BIFANG_02039                                      | + | + | + | + | + | - | - | - | - | - |
| BIFPSEUDO_04134 | hypothetical protein BIFPSEUDO_04407                       | + | + | + | - | - | - | - | - | - | - |
| BIFPSEUDO_04135 | major facilitator superfamily MFS_1                        | + | + | + | - | - | - | - | - | - | - |
| BIFPSEUDO_04141 | Predicted ATPase                                           | + | + | + | + | - | - | - | - | - | - |
| BIFPSEUDO_04144 | glucose-1-phosphate thymidyltransferase                    | + | + | - | - | - | - | - | - | - | - |
| BIFPSEUDO_04145 | RmlD substrate binding domain                              | + | + | + | - | + | + | + | + | + | + |
| BIFPSEUDO_04146 | Ramnose biosynthesis dTDP-glucose 4,6-dehydratase          | + | + | - | - | - | - | - | - | - | - |
| BIFPSEUDO_04149 | cell wall biogenesis glycosyltransferase                   | + | - | - | - | + | - | + | - | - | - |
| BIFPSEUDO_04150 | Predicted acyltransferases                                 | + | + | - | - | - | - | - | - | - | - |
| BIFPSEUDO_04151 | Rhamnan synthesis protein F                                | + | + | - | - | - | - | - | - | - | - |
| BIFPSEUDO_04152 | C superfamily ATP binding cassette transporter ABC protein | + | + | - | - | - | - | - | - | - | - |
| BIFPSEUDO_04153 | ABC-2 type transporter                                     | + | + | - | - | - | - | - | - | - | - |
| BIFPSEUDO_04155 | phosphoglycerol transferase                                | + | + | + | - | + | - | + | - | + | + |
| BIFPSEUDO_04160 | Major Facilitator Superfamily                              | + | + | + | + | + | - | + | + | + | + |
| BIFPSEUDO_04167 | putative dihydrolipoamide succinyltransferase              | + | + | + | - | + | + | + | + | + | + |
| BIFPSEUDO_04172 | Major intrinsic protein (MIP) superfamily                  | + | + | + | + | + | - | + | + | + | + |

|                 |                                                        |   |   |   |   |   |   |   |   |   |   |
|-----------------|--------------------------------------------------------|---|---|---|---|---|---|---|---|---|---|
| BIFPSEUDO_04173 | hypothetical protein                                   | + | + | + | + | + | - | - | - | - | - |
| BIFPSEUDO_04175 | hypothetical protein BIFADO_01725                      | + | + | + | + | - | - | - | - | - | - |
| BIFPSEUDO_04176 | glutamyl-tRNA synthetase                               | + | + | + | + | + | - | + | + | + | + |
| BIFPSEUDO_04187 | uridine 5'-monophosphate synthase                      | + | + | + | - | + | + | + | + | + | + |
| BIFPSEUDO_04195 | hypothetical protein BIFADO_01699                      | + | + | + | + | + | + | + | - | + | + |
| BIFPSEUDO_04201 | hypothetical protein BAD_1451                          | + | + | + | + | - | - | - | - | - | - |
| BIFPSEUDO_04225 | ATP synthase                                           | + | + | + | + | + | + | + | - | + | + |
| BIFPSEUDO_04253 | hypothetical protein                                   | + | + | + | + | + | + | + | - | - | - |
| BIFPSEUDO_04256 | ABC-type sugar transport system, periplasmic component | + | + | + | - | + | + | + | + | + | + |
| BIFPSEUDO_04259 | ABC-type sugar transport system, permease component    | + | + | + | - | + | + | + | + | + | + |
| BIFPSEUDO_04266 | hypothetical protein                                   | + | - | - | - | + | + | + | + | + | + |
| BIFPSEUDO_04271 | Glutamine amidotransferases class-II                   | + | + | + | + | + | + | + | + | - | + |
| BIFPSEUDO_04280 | hypothetical protein BIFDEN_00979                      | + | + | + | + | - | - | - | - | - | - |
| BIFPSEUDO_04289 | binding-protein-dependent transport systems            | + | + | + | - | + | + | + | + | + | - |
| BIFPSEUDO_04290 | binding-protein-dependent transport systems            | + | + | + | - | + | - | + | + | + | - |
| BIFPSEUDO_04291 | extracellular solute-binding protein, family 1         | + | + | + | + | + | - | + | + | + | + |
| BIFPSEUDO_04292 | hypothetical protein                                   | + | + | - | - | + | - | + | - | + | + |
| BIFPSEUDO_04293 | regulatory protein, LacI                               | + | + | - | - | + | - | - | + | - | - |
| BIFPSEUDO_04295 | putative glycosyl hydrolase family protein             | + | + | - | + | + | - | - | - | - | - |
| BIFPSEUDO_04296 | diguanylate cyclase/phosphodiesterase                  | + | + | - | + | + | - | - | - | - | - |
| BIFPSEUDO_04300 | glucosamine-6-phosphate deaminase                      | + | + | + | + | + | - | - | + | + | + |
| BIFPSEUDO_04305 | permease of ABC transporter for sugars                 | + | + | - | + | + | - | + | - | - | - |
| BIFPSEUDO_04306 | family 1 extracellular solute-binding protein          | + | + | - | + | - | - | - | - | - | - |
| BIFPSEUDO_04309 | putative sugar transporter                             | + | + | + | + | + | - | + | - | + | + |
| BIFPSEUDO_04317 | hypothetical protein BIFCAT_01448                      | + | + | + | + | + | - | + | - | - | + |
| BIFPSEUDO_04326 | hypothetical protein BIFDEN_00901                      | + | + | + | + | - | - | - | - | - | - |
| BIFPSEUDO_04334 | kaline phosphatase                                     | + | + | + | + | + | - | - | - | - | - |
| BIFPSEUDO_04336 | sortase                                                | + | + | + | + | - | - | - | - | - | - |
| BIFPSEUDO_04337 | cell wall surface anchor family protein                | + | + | + | + | - | - | - | - | - | - |
| BIFPSEUDO_04338 | putative surface-anchored fimbrial subunit             | + | + | - | - | - | - | - | - | + | + |
| BIFPSEUDO_04343 | putative ABC transport system membrane protein         | + | + | + | + | - | - | - | - | - | - |
| BIFPSEUDO_04348 | ABC-type polysaccharide transport system               | + | + | + | + | + | - | + | - | + | + |
| BIFPSEUDO_04354 | hypothetical protein                                   | + | + | + | + | - | - | - | - | - | - |
| BIFPSEUDO_04356 | hyp prot BIFDEN_00870                                  | + | + | + | + | + | - | + | - | + | - |
| BIFPSEUDO_04357 | Permease protein of ABC transporter                    | + | + | + | + | + | - | + | - | + | + |
| BIFPSEUDO_04358 | ABC transporter permease                               | + | + | + | + | + | - | + | + | + | - |
| BIFPSEUDO_04362 | LysR-type transcriptional regulators                   | + | + | + | + | + | + | + | - | + | + |
| BIFPSEUDO_04363 | probable alpha-1,4-glucosidase                         | + | + | + | + | + | + | + | + | - | + |
| BIFPSEUDO_04364 | ABC transporter solute-binding protein                 | + | + | + | + | + | - | + | - | + | - |
| BIFPSEUDO_04365 | probable phosphoglycerate mutase protein               | + | + | + | + | + | - | + | - | + | + |

|                 |                                                              |   |   |   |   |   |   |   |   |   |   |
|-----------------|--------------------------------------------------------------|---|---|---|---|---|---|---|---|---|---|
| BIFPSEUDO_04367 | hypothetical protein                                         | + | + | + | + | - | - | - | - | - | - |
| BIFPSEUDO_04378 | hypothetical protein BIFDEN_02462                            | + | + | + | + | + | + | + | - | + | + |
| BIFPSEUDO_04379 | beta-N-acetylglucosaminidase                                 | + | + | + | + | + | - | + | - | + | + |
| BIFPSEUDO_04380 | UspA domain protein                                          | + | + | + | + | + | - | - | - | - | + |
| BIFPSEUDO_04381 | ATP-dependent Clp protease ATP-binding subunit ClpC          | + | + | + | + | + | - | + | - | - | + |
| BIFPSEUDO_04384 | The Major Facilitator Superfamily (MFS)                      | + | + | - | + | + | - | + | + | + | + |
| BIFPSEUDO_04391 | ABC-type polar amino acid transport system, ATPase component | + | + | + | + | - | + | + | + | + | - |
| BIFPSEUDO_04415 | hypothetical protein                                         | + | + | + | + | + | - | + | + | + | + |
| BIFPSEUDO_04422 | Endonuclease                                                 | + | - | + | + | + | + | + | + | + | + |
| BIFPSEUDO_04432 | putative response regulator                                  | + | - | + | + | + | + | + | + | + | + |
| BIFPSEUDO_04434 | proline iminopeptidase                                       | + | - | - | + | - | - | - | - | - | - |
| BIFPSEUDO_04453 | Trimeric dUTP diphosphatases                                 | + | + | + | + | + | + | + | - | + | + |
| BIFPSEUDO_04454 | Predicted esterase                                           | + | + | + | + | + | + | - | - | + | + |
| BIFPSEUDO_04457 | tRNA-specific adenosine deaminase                            | + | + | + | + | + | - | + | - | - | - |
| BIFPSEUDO_04460 | Transcriptional regulator/sugar kinase                       | + | + | - | - | + | + | - | + | - | + |
| BIFPSEUDO_04461 | ABC-type sugar transport system, periplasmic component       | + | + | - | - | + | + | - | - | - | + |
| BIFPSEUDO_04462 | ABC-type polysaccharide transport system                     | + | + | - | + | + | + | - | + | - | + |
| BIFPSEUDO_04463 | ABC-type sugar transport system, permease component          | + | + | - | - | + | + | + | - | + | + |
| BIFPSEUDO_04465 | catabolic threonine dehydratase                              | + | + | + | + | - | + | - | - | - | - |
| BIFPSEUDO_04467 | hypothetical protein                                         | + | - | - | - | - | + | - | + | + | + |
| BIFPSEUDO_04468 | Esterases and lipases                                        | + | + | + | + | - | - | - | - | - | - |
