# Supplementary material
Source: PubMed Central journal article supplement (PMC3536097)
Supplement: AEM.02467-12_zam999103955so3.pdf [file AEM.02467-12_zam999103955so3.pdf]

**Table S3:** Genes of the *B. adolescentis* core genome sequences involved in the breakdown of carbohydrates

| ORFs name                           |                       |                                         | Family | Product                              |
|-------------------------------------|-----------------------|-----------------------------------------|--------|--------------------------------------|
| <i>B. adolescentis</i><br>ATCC15703 | <i>B. dentium</i> Bd1 | <i>B. pseudocatenulatum</i><br>DSM20438 |        |                                      |
| BAD_0156                            | BDP_0949              | BIFPSEUDO_03150                         | GH1    | beta-glucosidase                     |
| BAD_1529                            | BDP_2104              | BIFPSEUDO_02879                         | GH127  | Putative glycosyl hydrolase          |
| BAD_0667                            | BDP_0893              | BIFPSEUDO_03470                         | GH13   | glycogen branching enzyme            |
| BAD_0683                            | BDP_0994              | BIFPSEUDO_03491                         | GH13   | glycogen operon protein GlgX         |
| BAD_0707                            | BDP_1029              | BIFPSEUDO_03536                         | GH13   | putative alpha-amylase               |
| BAD_1435                            | BDP_1968              | BIFPSEUDO_04210                         | GH13   | glycanase/glycogenase                |
| BAD_1534                            | BDP_2112              | BIFPSEUDO_04313                         | GH2    | glycosyl hydrolase                   |
| BAD_1350                            | BDP_1814              | BIFPSEUDO_03324                         | GH23   | Putative glycosyl hydrolase          |
| BAD_1614                            | BDP_2262              | BIFPSEUDO_03971                         | GH23   | Putative glycosyl hydrolase          |
| BAD_1194                            | BDP_1657              | BIFPSEUDO_03128                         | GH3    | putative beta-glucosidase            |
| BAD_1197                            | BDP_1671              | BIFPSEUDO_03132                         | GH3    | beta-D-glucosideglucohydrolase       |
| BAD_1611                            | BDP_2254              | BIFPSEUDO_03966                         | GH3    | beta-glucosidase-related glycosidase |
| BAD_1599                            | BDP_2158              | BIFPSEUDO_03305                         | GH31   | alpha-xylosidase                     |
| BAD_1150                            | BDP_1603              | BIFPSEUDO_03078                         | GH32   | beta-fructofuranosidase              |
| BAD_0452                            | BDP_0624              | BIFPSEUDO_02708                         | GH42   | alpha-1,4-glucosidase                |
| BAD_0428                            | BDP_0562              | BIFPSEUDO_02470                         | GH43   | beta-1,4-xylosidase                  |
| BAD_1527                            | BDP_2094              | BIFPSEUDO_04184                         | GH43   | endo-1,4-beta-xylanase               |
| BAD_1202                            | BDP_1679              | BIFPSEUDO_03138                         | GH5    | beta-1,3-exoglucanase                |
| BAD_1524                            | BDP_2091              | BIFPSEUDO_04275                         | GH51   | alpha-arabinofuranosidase I          |
| BAD_0308                            | BDP_0418              | BIFPSEUDO_02640                         | GH77   | 4-alpha-glucanotransferase           |
| BAD_0109                            | BDP_0185              | BIFPSEUDO_02896                         | GT2    | glycosyltransferase                  |
| BAD_0404                            | BDP_0541              | BIFPSEUDO_02515                         | GT2    | glycosyltransferase                  |
| BAD_0406                            | BDP_0543              | BIFPSEUDO_02513                         | GT2    | hypothetical protein                 |
| BAD_0660                            | BDP_0886              | BIFPSEUDO_03462                         | GT2    | hypothetical protein                 |
| BAD_0958                            | BDP_2041              | BIFPSEUDO_03856                         | GT2    | glycosyltransferase                  |
| BAD_1101                            | BDP_1542              | BIFPSEUDO_03014                         | GT28   | glycosyltransferase GT28             |
| BAD_0751                            | BDP_1081              | BIFPSEUDO_03596                         | GT4    | glycosyltransferase                  |
| BAD_0157                            | BDP_0244              | BIFPSEUDO_02837                         | GT51   | glycosyl transferase family protein  |
| BAD_1336                            | BDP_1801              | BIFPSEUDO_03339                         | GT51   | glycosyl transferase family 51       |

|          |          |                 |                              |                                                |
|----------|----------|-----------------|------------------------------|------------------------------------------------|
| BAD_0426 | BDP_0566 | BIFPSEUDO_02472 | (MalEFGK<br>(3.A.1.1.7))     | putative binding protein-dependent transporter |
| BAD_1288 | BDP_2196 | BIFPSEUDO_03304 | (AraNPQMsmX<br>(3.A.1.1.34)) | sugar ABC transporter                          |
| BAD_1566 | BDP_0565 | BIFPSEUDO_02473 | (MalK (3.A.1.1.27))          | ABC transporter solute-binding protein         |

Genes predicted to encode carbohydrate transporters are highlighted in gray
